# Supplementary material
Source: PubMed Central journal article supplement (PMC6537826)
Supplement: jamafacialplastsurg-21-213-s001.pdf [file jamafacialplastsurg-21-213-s001.pdf]

## Supplementary Online Content

Hsieh T-y, Funamura JL, Dedhia R, Durbin-Johnson B, Dunbar C, Tollefson TT.  
Risk factors associated with complications after treatment of mandible fractures.  
*JAMA Facial Plast Surg*. Published online January 24, 2019.  
doi:10.1001/jamafacial.2018.1836

**eTable.** Diagnostic and Procedure Codes for Mandible Fractures

This supplementary material has been provided by the authors to give readers additional information about their work.

**eTable.** Diagnostic and Procedure Codes for Mandible Fractures

|        |                                                                                                                                                                                                                                                                                                                                                                                                                                                                                                                                                                                                                                                                                                                |
|--------|----------------------------------------------------------------------------------------------------------------------------------------------------------------------------------------------------------------------------------------------------------------------------------------------------------------------------------------------------------------------------------------------------------------------------------------------------------------------------------------------------------------------------------------------------------------------------------------------------------------------------------------------------------------------------------------------------------------|
| ICD-9  | 802.2, 802.20, 802.21, 802.22, 802.23, 802.24, 802.25, 802.26, 802.27, 802.28, 802.29, 802.3, 802.30, 802.31, 802.32, 802.33, 802.34, 802.35, 802.36, 802.37, 802.38, 802.39                                                                                                                                                                                                                                                                                                                                                                                                                                                                                                                                   |
| ICD-10 | S02.6, S02.60, S02.600A, S02.600B, S02.600D, S02.600G, S02.600K, S02.600S, S02.609, S02.609A, S02.609B, S02.609D, S02.609G, S02.609K, S02.609S, S02.61, S02.61XA, S02.61XB, S02.61XD, S02.61XG, S02.61XK, S02.61XS, S02.62, S02.62XA, S02.62XB, S02.62XD, S02.62XG, S02.62XK, S02.62XS, S02.63, S02.63XA, S02.63XB, S02.63XD, S02.63XG, S02.63XK, S02.63XS, S02.64, S02.64XA, S02.64XB, S02.64XD, S02.64XG, S02.64XK, S02.64XS, S02.65, S02.65XA, S02.65XB, S02.65XD, S02.65XG, S02.65XK, S02.65XS, S02.66, S02.66XA, S02.66XB, S02.66XD, S02.66XG, S02.66XK, S02.66XS, S02.67, S02.67XA, S02.67XB, S02.67XD, S02.67XG, S02.67XK, S02.67XS, S02.69, S02.69XA, S02.69XB, S02.69XD, S02.69XG, S02.69XK, S02.69XS |
| CPT    | 21450, 21451, 21452, 21453, 21454, 21461, 21462, 21465, 21470                                                                                                                                                                                                                                                                                                                                                                                                                                                                                                                                                                                                                                                  |
